# Supplementary material for: Relative Efficacy and Safety of Anti-Inflammatory Biologic Agents for Osteoarthritis: A Conventional and Network Meta-Analysis
Source: MDPI journal article supplement (doi:10.3390/jcm11143958), 2022-07-07
Supplement: s1 [file s1]

## Supplementary Materials

Table S1. PRISMA extension statement for network meta-analysis.

Table S2. Literature search procedures and strategies.

Table S3. A hierarchy list of data extraction.

Table S4. Rank probability of pain.

Table S5. Rank probability of physical function.

Table S6. Network meta-analysis of stiffness for different interventions.

Table S7. Rank probability of stiffness.

Table S8. Network meta-analysis of AEs for different interventions.

Table S9. Sensitivity analysis in pain, stiffness and function.

Table S10. Sensitivity analysis in adverse events.

Table S11. Node-splitting analyses of pain.

Table S12. ISD of inconsistency test.

Table S13. Results of Egger's test.

Figure S1. Results of the conventional meta-analysis of pain.

Figure S2. Results of the conventional meta-analysis of physical function.

Figure S3. Results of the conventional meta-analysis of stiffness.

Figure S4. Results of the conventional meta-analysis of adverse events.

Figure S5. Publication bias examined by funnel plot.

Table S1: PRISMA extension statement for network meta-analysis

| Section/Topic      | Item # | Checklist Item                                                                                                                                                                                                                                                                                                                                                                                                              | Reported on Page # |
|--------------------|--------|-----------------------------------------------------------------------------------------------------------------------------------------------------------------------------------------------------------------------------------------------------------------------------------------------------------------------------------------------------------------------------------------------------------------------------|--------------------|
| <b>TITLE</b>       | 1      | Identify the report as a systematic review incorporating a network meta-analysis (or related form of meta-analysis)                                                                                                                                                                                                                                                                                                         | 1                  |
| Title              |        |                                                                                                                                                                                                                                                                                                                                                                                                                             |                    |
| <b>ABSTRACT</b>    |        |                                                                                                                                                                                                                                                                                                                                                                                                                             |                    |
| Structured summary | 2      | Provide a structured summary including, as applicable:<br><b>Background:</b> main objectives<br><b>Methods:</b> data sources; study eligibility criteria, participants, and interventions; study and synthesis methods, such as network meta-analysis.<br><b>Results:</b> number of studies and participants identified; summary estimates with corresponding confidence/credible intervals; treatment rankings may also be | 2,3                |

discussed. Authors may choose to summarize pairwise comparisons against a chosen treatment included in their analyses for brevity.

**Discussion/Conclusion:** limitations; conclusions and implications of findings.

**Other:** primary source of funding; systematic review registration number with registry name

## INTRODUCTION

|            |   |                                                                                                                                                             |     |
|------------|---|-------------------------------------------------------------------------------------------------------------------------------------------------------------|-----|
| Rationale  | 3 | Describe the rationale for the review in the context of what is already known, including mention of why a network meta-analysis has been conducted.         | 4   |
| Objectives | 4 | Provide an explicit statement of questions being addressed, with reference to participants, interventions, comparisons, outcomes, and study design (PICOS). | 4,5 |

## METHODS

|                                        |           |                                                                                                                                                                                                                                                                                                                                                                            |                             |
|----------------------------------------|-----------|----------------------------------------------------------------------------------------------------------------------------------------------------------------------------------------------------------------------------------------------------------------------------------------------------------------------------------------------------------------------------|-----------------------------|
| Protocol and registration              | 5         | Indicate whether a review protocol exists and if and where it can be accessed (e.g., Web address); and, if available, provide registration information, including registration number.                                                                                                                                                                                     | 5                           |
| Eligible criteria                      | 6         | Specify study characteristics (e.g., PICOS, length of follow-up) and report characteristics (e.g., years considered, language, publication status) used as criteria for eligibility, giving rationale. Clearly describe eligible treatments included in the treatment network, and note whether any have been clustered or merged into the same node (with justification). | 5,6                         |
| Information sources                    | 7         | Describe all information sources (e.g., databases with dates of coverage, contact with study authors to identify additional studies) in the search and date last searched.                                                                                                                                                                                                 | 5                           |
| Search                                 | 8         | Present full electronic search strategy for at least one database, including any limits used, such that it could be repeated.                                                                                                                                                                                                                                              | Online resource Appendix. 1 |
| Study selection                        | 9         | State the process for selecting studies (i.e., screening, eligibility, included in systematic review, and, if applicable, included in the meta-analysis).                                                                                                                                                                                                                  | 6                           |
| Data collection process                | 10        | Describe method of data extraction from reports (e.g., piloted forms, independently, in duplicate) and any processes for obtaining and confirming data from investigators.                                                                                                                                                                                                 | 6,7                         |
| Data items                             | 11        | List and define all variables for which data were sought (e.g., PICOS, funding sources) and any assumptions and simplifications made.                                                                                                                                                                                                                                      | 6                           |
| <b>Geometry of the network</b>         | <b>S1</b> | Describe methods used to explore the geometry of the treatment network under study and potential biases related to it. This should include how the evidence base has been graphically summarized for presentation, and what characteristics were compiled and used to describe the evidence base to readers.                                                               | 9,10                        |
| Risk of bias within individual studies | 12        | Describe methods used for assessing risk of bias of individual studies (including specification of whether this was done at the study or outcome level), and how this information is to be used in any data synthesis.                                                                                                                                                     | 7,8                         |
| Summary measures                       | 13        | State the principal summary measures (e.g., risk ratio, difference in means). Also describe the use of additional summary measures assessed, such as treatment rankings and surface under the cumulative ranking curve (SUCRA) values, as well as modified approaches used to present summary findings from meta-analyses.                                                 | 8,9                         |

|                                    |           |                                                                                                                                                                                                                                                                                                                                                                                                                                                       |             |
|------------------------------------|-----------|-------------------------------------------------------------------------------------------------------------------------------------------------------------------------------------------------------------------------------------------------------------------------------------------------------------------------------------------------------------------------------------------------------------------------------------------------------|-------------|
| Planned methods of analysis        | 14        | Describe the methods of handling data and combining results of studies for each network meta-analysis. This should include, but not be limited to: <ul style="list-style-type: none"> <li>• Handling of multi-arm trials;</li> <li>• Selection of variance structure;</li> <li>• Selection of prior distributions in Bayesian analyses; and</li> <li>• Assessment of model fit.</li> </ul>                                                            | 8,9         |
| <b>Assessment of Inconsistency</b> | <b>S2</b> | Describe the statistical methods used to evaluate the agreement of direct and indirect evidence in the treatment network(s) studied. Describe efforts taken to address its presence when found.                                                                                                                                                                                                                                                       | 8,9         |
| Risk of bias across studies        | 15        | Specify any assessment of risk of bias that may affect the cumulative evidence (e.g., publication bias, selective reporting within studies).                                                                                                                                                                                                                                                                                                          | 7,8         |
| Additional analyses                | 16        | Describe methods of additional analyses if done, indicating which were pre-specified. This may include, but not be limited to, the following: <ul style="list-style-type: none"> <li>• Sensitivity or subgroup analyses;</li> <li>• Meta-regression analyses;</li> <li>• Alternative formulations of the treatment network; and</li> <li>• Use of alternative prior distributions for Bayesian analyses (if applicable).</li> </ul>                   | 8           |
| <b>RESULTS</b>                     |           |                                                                                                                                                                                                                                                                                                                                                                                                                                                       |             |
| Study selection                    | 17        | Given numbers of studies screened, assessed for eligibility, and included in the review, with reasons for exclusions at each stage, ideally with a flow diagram.                                                                                                                                                                                                                                                                                      | 9           |
| Presentation of network structure  | S3        | Provide a network graph of the included studies to enable visualization of the geometry of the treatment network.                                                                                                                                                                                                                                                                                                                                     | 22 (Fig. 2) |
| Summary of network geometry        | S4        | Provide a brief overview of characteristics of the treatment network. This may include commentary on the abundance of trials and randomized patients for different interventions and pairwise comparisons in the network, gaps of evidence in the treatment network, and potential biases reflected by the network structure.                                                                                                                         | 9,10        |
| Study characteristics              | 18        | For each study, present characteristics for which data was extracted (e.g., study size, PICOS, follow-up period) and provide the citations.                                                                                                                                                                                                                                                                                                           | 9,10,23,24  |
| Risk of bias within studies        | 19        | Present data on risk of bias of each study and, if available, any outcome level assessment.                                                                                                                                                                                                                                                                                                                                                           | 12,13       |
| Results of individual studies      | 20        | For all outcomes considered (benefits or harms), present, for each study: 1) simple summary data for each intervention group, and 2) effect estimates and confidence intervals. Modified approaches may be needed to deal with information from larger networks.                                                                                                                                                                                      | 10,11,12    |
| Synthesis of results               | 21        | Present results of each meta-analysis done, including confidence/credible intervals. In larger networks, authors may focus on comparisons versus a particular comparator (e.g. placebo or standard care), with full findings presented in an appendix. League tables and forest plots may be considered to summarize pairwise comparisons. If additional summary measures were explored (such as treatment rankings), these should also be presented. | 10,11,12    |
| Exploration for inconsistency      | S5        | Describe results from investigations of inconsistency. This may include such information                                                                                                                                                                                                                                                                                                                                                              | 12          |

|                                |    |                                                                                                                                                                                                                                                                                                                                                                                                                               |       |
|--------------------------------|----|-------------------------------------------------------------------------------------------------------------------------------------------------------------------------------------------------------------------------------------------------------------------------------------------------------------------------------------------------------------------------------------------------------------------------------|-------|
|                                |    | as measures of model fit to compare consistency and inconsistency models, <i>P</i> values from statistical tests, or summary of inconsistency estimates from different parts of the treatment network.                                                                                                                                                                                                                        |       |
| Risk of bias across studies    | 22 | Present results of any assessment of risk of bias across studies for the evidence base being studied.                                                                                                                                                                                                                                                                                                                         | 12,13 |
| Results of additional analyses | 23 | Give results of additional analyses, if done (e.g., sensitivity or subgroup analyses, meta-regression analyses, alternative network geometries studied, alternative choice of prior distributions for Bayesian analyses, and so forth).                                                                                                                                                                                       | 13    |
| <b>DISCUSSION</b>              |    |                                                                                                                                                                                                                                                                                                                                                                                                                               |       |
| Summary of evidence            | 24 | Summarize the main findings, including the strength of evidence for each main outcomes; consider their relevance to key groups (e.g., healthcare providers, users, and policy-makers).                                                                                                                                                                                                                                        | 13    |
| Limitations                    | 25 | Discuss limitations at study and outcome level (e.g., risk of bias), and review level (e.g., incomplete retrieval of identified research, reporting bias). Comment on the validity of the assumptions, such as transitivity and consistency. Comment on any concerns regarding network geometry (e.g., avoidance of certain comparisons).                                                                                     | 16    |
| Conclusion                     | 26 | Provide a general interpretation of the results in the contest of other evidence, and implications for future research.                                                                                                                                                                                                                                                                                                       | 17    |
| <b>FUNDING</b>                 |    |                                                                                                                                                                                                                                                                                                                                                                                                                               |       |
| Funding                        | 27 | Describe sources of funding for the systematic review and other support (e.g., supple of data); role of funders for the systematic review. This should also include information regarding whether funding has been received from manufacturers of treatment in the network and/or whether some of the authors are content experts with professional conflicts of interest that could affect use of treatments in the network. | 17    |

**Table S2. Literature search procedures and strategies.**

| PubMed |                                                                                                                                                                                                                                                                                                                                                                                    |  |         |
|--------|------------------------------------------------------------------------------------------------------------------------------------------------------------------------------------------------------------------------------------------------------------------------------------------------------------------------------------------------------------------------------------|--|---------|
| No.    | Query                                                                                                                                                                                                                                                                                                                                                                              |  | Results |
| 1      | "osteoarthritis"[MeSH Terms] OR "osteoarthritis"[Title/Abstract] OR "Osteoarthritis"[Title/Abstract] OR "Osteoarthrosis"[Title/Abstract] OR "Osteoarthroses"[Title/Abstract] OR "Arthrosis"[Title/Abstract] OR "Arthroses"[Title/Abstract] OR "Degenerative Arthritides"[Title/Abstract] OR "Degenerative Arthritis"[Title/Abstract] OR "Osteoarthrosis Deformans"[Title/Abstract] |  | 96,093  |

|   |                                                                                                                                                                                                                                                                                                                                                                                                                                                                                                                                                                                                                                                                                                                                                                                                                                                                                                                                                               |        |
|---|---------------------------------------------------------------------------------------------------------------------------------------------------------------------------------------------------------------------------------------------------------------------------------------------------------------------------------------------------------------------------------------------------------------------------------------------------------------------------------------------------------------------------------------------------------------------------------------------------------------------------------------------------------------------------------------------------------------------------------------------------------------------------------------------------------------------------------------------------------------------------------------------------------------------------------------------------------------|--------|
| 2 | "Tumor Necrosis Factor Inhibitors"[Mesh] OR "Tumor Necrosis Factor Inhibitors"[Title/Abstract] OR "Tumor Necrosis Factor Inhibitor"[Title/Abstract] OR "TNF Antagonists"[Title/Abstract] OR "TNF Antagonist"[Title/Abstract] OR "TNF Inhibitors"[Title/Abstract] OR "TNF Inhibitor"[Title/Abstract] OR "TNF Blockers"[Title/Abstract] OR "TNF Blocker"[Title/Abstract] OR "Tumor Necrosis Factor Antagonists"[Title/Abstract] OR "Tumor Necrosis Factor Antagonist"[Title/Abstract] OR "Tumor Necrosis Factor Blockers"[Title/Abstract] OR "Tumor Necrosis Factor Blocker"[Title/Abstract] OR "Tumor Necrosis Factor-alpha Antagonists"[Title/Abstract] OR "Tumor Necrosis Factor-alpha Antagonist"[Title/Abstract] OR "Tumor Necrosis Factor-alpha Inhibitors"[Title/Abstract] OR "Tumor Necrosis Factor-alpha Inhibitor"[Title/Abstract] OR "Tumor Necrosis Factor-alpha Blockers"[Title/Abstract] OR "Tumor Necrosis Factor-alpha Blocker"[Title/Abstract] | 5,760  |
| 3 | Adalimumab[Mesh] OR Humira[Title/Abstract] OR Adalimumab[Title/Abstract] OR Amjevita[Title/Abstract] OR Cyltezo[Title/Abstract] OR "Adalimumab-adbm"[Title/Abstract] OR "Adalimumab-atto"[Title/Abstract]                                                                                                                                                                                                                                                                                                                                                                                                                                                                                                                                                                                                                                                                                                                                                     | 8,674  |
| 4 | Infliximab[Mesh] OR Infliximab[Title/Abstract] OR Renflexis[Title/Abstract] OR Inflectra[Title/Abstract] OR Remicade[Title/Abstract] OR "Monoclonal Antibody cA2"[Title/Abstract] OR "MAb cA2"[Title/Abstract] OR "Infliximab-abda"[Title/Abstract] OR "Infliximab-dyyb"[Title/Abstract]                                                                                                                                                                                                                                                                                                                                                                                                                                                                                                                                                                                                                                                                      | 15,177 |
| 5 | Etanercept [MeSH] OR Etanercept [Title/Abstract] OR "TNFR-Fc Fusion Protein" [Title/Abstract] OR "TNFR Fc Fusion Protein" [Title/Abstract] OR "TNR 001" [Title/Abstract] OR "TNT Receptor Fusion Protein" [Title/Abstract] OR "TNTR-Fc" [Title/Abstract] OR "TNR-001" [Title/Abstract] OR "TNR001" [Title/Abstract] OR "Etanercept-szsz" [Title/Abstract] OR "TNF Receptor Type II-IgG Fusion Protein" [Title/Abstract] OR "TNF Receptor Type II IgG Fusion Protein" [Title/Abstract] OR "Erelzi" [Title/Abstract] OR "Enbrel" [Title/Abstract] OR "Recombinant Human Dimeric TNF Receptor Type II-IgG Fusion Protein" [Title/Abstract] OR                                                                                                                                                                                                                                                                                                                    | 8,743  |

|    |                                                                                                                                                                                                                                                                                                                                                                                                                    |        |
|----|--------------------------------------------------------------------------------------------------------------------------------------------------------------------------------------------------------------------------------------------------------------------------------------------------------------------------------------------------------------------------------------------------------------------|--------|
|    | "Recombinant Human Dimeric TNF Receptor Type II IgG Fusion Protein" [Title/Abstract]                                                                                                                                                                                                                                                                                                                               |        |
| 6  | "Certolizumab Pegol" [MeSH] OR "Certolizumab Pegol"[Title/Abstract] OR Cimzia [Title/Abstract] OR CDP870 [Title/Abstract] OR "CDP 870" [Title/Abstract]                                                                                                                                                                                                                                                            | 1,052  |
| 7  | golimumab [Supplementary Concept] OR "CNTO-148"[Title/Abstract] OR "CNTO 148" [Title/Abstract] OR Simponi [Title/Abstract]                                                                                                                                                                                                                                                                                         | 649    |
| 8  | #2 OR #3 OR #4 OR #5 OR #6 OR #7                                                                                                                                                                                                                                                                                                                                                                                   | 27,571 |
| 9  | AMG 108 [Supplementary Concept] OR "AMG-108"[Title/Abstract] OR AMG108[Title/Abstract]                                                                                                                                                                                                                                                                                                                             | 4      |
| 10 | "Canakinumab"[Supplementary Concept] OR "Canakinumab"[Title/Abstract] OR "ilaris"[Title/Abstract] OR "ACZ-885"[Title/Abstract] OR "ACZ885"[Title/Abstract]                                                                                                                                                                                                                                                         | 749    |
| 11 | "Iutikizumab" [Supplementary Concept] OR ABT-981[Title/Abstract] OR Iutikizumab[Title/Abstract]                                                                                                                                                                                                                                                                                                                    | 6      |
| 12 | "Interleukin 1 Receptor Antagonist Protein"[Mesh] OR "Interleukin 1 Receptor Antagonist Protein"[Title/Abstract] OR Anakinra[Title/Abstract] OR IL-1Ra[Title/Abstract] OR "Urine IL-1 Inhibitor"[Title/Abstract] OR Antril[Title/Abstract] OR Kineret[Title/Abstract] OR "Urine Derived IL1 Inhibitor"[Title/Abstract] OR "Urine-Derived IL1 Inhibitor"[Title/Abstract] OR "IL1 Febrile Inhibitor"[Title/Abstract] | 9,108  |
| 13 | gevokizumab[Supplementary Concept] OR gevokizumab[Title/Abstract] OR "XOMA 052"[Title/Abstract] OR XOMA052[Title/Abstract] OR XOMA-052[Title/Abstract] OR "XMA005.2"[Title/Abstract] OR "XMA 005.2"[Title/Abstract] OR "XMA-005.2"[Title/Abstract]                                                                                                                                                                 | 53     |

|    |                                                                                                                                                                                                                                                                                                                                                                                                                                                                                                                                                                                                                                                                                                                                                                                                                                                                                                                                                                                                                                  |           |
|----|----------------------------------------------------------------------------------------------------------------------------------------------------------------------------------------------------------------------------------------------------------------------------------------------------------------------------------------------------------------------------------------------------------------------------------------------------------------------------------------------------------------------------------------------------------------------------------------------------------------------------------------------------------------------------------------------------------------------------------------------------------------------------------------------------------------------------------------------------------------------------------------------------------------------------------------------------------------------------------------------------------------------------------|-----------|
| 14 | "antagonists and inhibitors"[MeSH Subheading] OR "inhibitor"[Title/Abstract] OR "antagonist"[Title/Abstract] OR "blocker"[Title/Abstract] OR "inhibitors"[Title/Abstract] OR "antagonists"[Title/Abstract] OR "blockers"[Title/Abstract] OR "antagonists and inhibitors"[Title/Abstract]                                                                                                                                                                                                                                                                                                                                                                                                                                                                                                                                                                                                                                                                                                                                         | 1,564,306 |
| 15 | "interleukin-17"[MeSH Terms] OR "interleukin-17"[Title/Abstract] OR "CTLA-8"[Title/Abstract] OR "interleukin-17"[Title/Abstract] OR "IL-17"[Title/Abstract] OR "interleukin 17f"[Title/Abstract] OR "interleukin 17f"[Title/Abstract] OR "IL-17F"[Title/Abstract] OR "cytokine ml 1"[Title/Abstract] OR "cytokine ml 1"[Title/Abstract] OR "interleukin 17c"[Title/Abstract] OR "interleukin 17c"[Title/Abstract] OR "IL-17C"[Title/Abstract] OR "interleukin 17e"[Title/Abstract] OR "interleukin 17e"[Title/Abstract] OR "interleukin 25"[Title/Abstract] OR "interleukin 25"[Title/Abstract] OR "il 17e"[Title/Abstract] OR "il 17e"[Title/Abstract] OR "interleukin 17a"[Title/Abstract] OR "interleukin 17a"[Title/Abstract] OR "cytotoxic t lymphocyte associated antigen 8"[Title/Abstract] OR "cytotoxic t lymphocyte associated antigen 8"[Title/Abstract] OR "IL-17A"[Title/Abstract] OR "CTLA8"[Title/Abstract] OR "interleukin 17b"[Title/Abstract] OR "interleukin 17b"[Title/Abstract] OR "IL-17B"[Title/Abstract] | 25,224    |
| 16 | "interleukin-6"[MeSH Terms] OR "interleukin-6"[Title/Abstract] OR "interleukin 6"[Title/Abstract] OR "IL6"[Title/Abstract] OR "IL-6"[Title/Abstract] OR "b cell stimulatory factor 2"[Title/Abstract] OR "b cell stimulatory factor-2"[Title/Abstract] OR "BSF-2"[Title/Abstract] OR "b cell differentiation factor 2"[Title/Abstract] OR "b cell differentiation factor-2"[Title/Abstract] OR "Hybridoma Growth Factor"[Title/Abstract] OR "IFN-beta 2"[Title/Abstract] OR "Plasmacytoma Growth Factor"[Title/Abstract] OR "MGI-2"[Title/Abstract] OR "hepatocyte stimulating factor"[Title/Abstract] OR "hepatocyte-stimulating factor"[Title/Abstract] OR "myeloid differentiation-inducing protein"[Title/Abstract] OR "myeloid differentiation inducing protein"[Title/Abstract] OR "b-cell                                                                                                                                                                                                                                 | 149,168   |

|           |                                                                                                                                                                                                                                                                                                                              |         |
|-----------|------------------------------------------------------------------------------------------------------------------------------------------------------------------------------------------------------------------------------------------------------------------------------------------------------------------------------|---------|
|           | differentiation factor"[Title/Abstract] OR "b cell differentiation factor"[Title/Abstract] OR "interferon beta 2"[Title/Abstract] OR "interferon beta-2"[Title/Abstract] OR "b cell stimulatory factor 2"[Title/Abstract] OR "b cell stimulatory factor-2"[Title/Abstract]                                                   |         |
| <b>17</b> | "interleukins"[MeSH Terms] OR "interleukin"[Title/Abstract] OR "interleukin"[Title/Abstract]                                                                                                                                                                                                                                 | 341,768 |
| <b>18</b> | (#15 OR #16 OR #17) AND #14                                                                                                                                                                                                                                                                                                  | 70,339  |
| <b>19</b> | tocilizumab[Supplementary Concept] OR tocilizumab[Title/Abstract] OR RHPM-1[Title/Abstract] OR RG-1569[Title/Abstract] OR R-1569[Title/Abstract] OR MSB11456[Title/Abstract] OR MSB-11456[Title/Abstract] OR atlizumab[Title/Abstract] OR RO-4877533[Title/Abstract] OR Actemra[Title/Abstract] OR roactemra[Title/Abstract] | 3,759   |
| <b>20</b> | sarilumab[Supplementary Concept] OR sarilumab[Title/Abstract] OR SAR-153191[Title/Abstract] OR SAR153191[Title/Abstract] OR Kevzara[Title/Abstract] OR REGN-88[Title/Abstract] OR REGN88[Title/Abstract]                                                                                                                     | 157     |
| <b>21</b> | ALX-0061[Supplementary Concept] OR ALX-0061[Title/Abstract] OR vobarilizumab [Title/Abstract]                                                                                                                                                                                                                                | 4       |
| <b>22</b> | SANT-7[Supplementary Concept] OR SANT-7[Title/Abstract] OR SANT7[Title/Abstract]                                                                                                                                                                                                                                             | 18      |
| <b>23</b> | satralizumab[Supplementary Concept] OR satralizumab[Title/Abstract]                                                                                                                                                                                                                                                          | 17      |
| <b>24</b> | sirukumab[Supplementary Concept] OR sirukumab[Title/Abstract] OR CNTO-136[Title/Abstract] OR "CNTO 136"[Title/Abstract]                                                                                                                                                                                                      | 3       |
| <b>25</b> | siltuximab[Supplementary Concept] OR siltuximab[Title/Abstract] OR CLLB8[Title/Abstract] OR "cCIB8 monoclonal antibody"[Title/Abstract] OR Sylvant[Title/Abstract] OR CNTO-                                                                                                                                                  | 171     |



|           |                                                                                                                                                                                                                                                                                                                              |           |
|-----------|------------------------------------------------------------------------------------------------------------------------------------------------------------------------------------------------------------------------------------------------------------------------------------------------------------------------------|-----------|
|           | 328[Title/Abstract] OR "monoclonal antibody CNTO-328"[Title/Abstract] OR "CNTO 328 monoclonal antibody"[Title/Abstract] OR "monoclonal antibody CNTO 328"[Title/Abstract] OR "monoclonal antibody CNTO328"[Title/Abstract]                                                                                                   |           |
| <b>26</b> | clazakizumab[Supplementary Concept] OR clazakizumab[Title/Abstract] OR ALD-518[Title/Abstract] OR ALD518[Title/Abstract] OR BMS-945429[Title/Abstract]                                                                                                                                                                       | 25        |
| <b>27</b> | olokizumab[Supplementary Concept] OR olokizumab[Title/Abstract] OR CDP-6038[Title/Abstract] OR CDP6038[Title/Abstract]                                                                                                                                                                                                       | 16        |
| <b>28</b> | Secukinumab[Supplementary Concept] OR Secukinumab[Title/Abstract] OR Cosentyx[Title/Abstract] OR "AIN 457"[Title/Abstract] OR AIN457[Title/Abstract] OR AIN-457[Title/Abstract]                                                                                                                                              | 1,177     |
| <b>29</b> | Ixekizumab[Supplementary Concept] OR Ixekizumab[Title/Abstract] OR Taltz[Title/Abstract] OR LY2439821[Title/Abstract] OR LY-2439821[Title/Abstract]                                                                                                                                                                          | 587       |
| <b>30</b> | Brodalumab[Supplementary Concept] OR Brodalumab[Title/Abstract] OR Siliq[Title/Abstract] OR KHK-4827[Title/Abstract] OR KHK4827[Title/Abstract] OR AMG-827[Title/Abstract] OR "AMG 827"[Title/Abstract]                                                                                                                      | 337       |
| <b>31</b> | #9 OR #10 OR #11 OR #12 OR #13 OR #18 OR #19 OR #20 OR #21 OR #22 OR #23 OR #24 OR #25 OR #26 OR #27 OR #28 OR #29 OR #30                                                                                                                                                                                                    | 77,779    |
| <b>32</b> | "randomized controlled trial"[Publication Type] OR "controlled clinical trial"[Publication Type] OR "randomized"[Title/Abstract] OR "randomised"[Title/Abstract] OR "randomization"[Title/Abstract] OR "randomisation"[Title/Abstract] OR "randomly"[Title/Abstract] OR "placebo"[Title/Abstract] OR "trial"[Title/Abstract] | 1,433,625 |
| <b>33</b> | "observational study"[publication type]                                                                                                                                                                                                                                                                                      | 86,304    |
| <b>34</b> | (#8 OR #31) AND #1 AND (#32 OR #33)                                                                                                                                                                                                                                                                                          | 89        |

|    |                            |    |
|----|----------------------------|----|
| 35 | (#8 OR #31) AND #1 AND #32 | 87 |
|----|----------------------------|----|

### Web of Science

| No. | Query                                                                                                                                                                                                                                                                                                                                                                                                                                             | Results |
|-----|---------------------------------------------------------------------------------------------------------------------------------------------------------------------------------------------------------------------------------------------------------------------------------------------------------------------------------------------------------------------------------------------------------------------------------------------------|---------|
| 1   | TS=(osteoarthritis OR Osteoarthritis OR Osteoarthrosis OR Osteoarthroses OR Arthrosis OR Arthroses OR "Degenerative Arthritides" OR "Degenerative Arthritis" OR "Osteoarthrosis Deformans")                                                                                                                                                                                                                                                       | 136,805 |
| 2   | TS=("Tumor Necrosis Factor Inhibitors" OR "TNF Antagonists" OR "TNF Inhibitors" OR "TNF Blockers" OR "Tumor Necrosis Factor Antagonists" OR "Tumor Necrosis Factor Blockers" OR "Tumor Necrosis Factor-a (TNFa) Antagonists" OR "Tumor Necrosis Factor-a (TNF-a) Inhibitors" OR "Tumor Necrosis Factor-a (TNFa) Blockers")                                                                                                                        | 5,161   |
| 3   | TS=(Adalimumab OR Humira OR Adalimumab-adbm OR Amjevita OR Adalimumabatto OR Cyltezo OR "D2E7 Antibody")                                                                                                                                                                                                                                                                                                                                          | 18,836  |
| 4   | TS=(Infliximab OR "Monoclonal Antibody cA2" OR "MAb cA2" OR Infliximababda OR Renflexis OR Infliximab-dyyb OR Inflectra OR Remicade)                                                                                                                                                                                                                                                                                                              | 32,615  |
| 5   | TS=(Etanercept OR "TNFR-Fc Fusion Protein" OR "TNFR Fc Fusion Protein" OR "TNR 001" OR "TNT Receptor Fusion Protein" OR "TNT R-Fc" OR "TNR-001" OR "TNR001" OR "Etanercept-szzs" OR "TNF Receptor Type II-IgG Fusion Protein" OR "TNF Receptor Type II IgG Fusion Protein" OR "Erelzi" OR "Enbrel" OR "Recombinant Human Dimeric TNF Receptor Type II-IgG Fusion Protein" OR "Recombinant Human Dimeric TNF Receptor Type II IgG Fusion Protein") | 17,522  |
| 6   | TS=("Certolizumab Pegol" OR "Certolizumab Pegol" OR Cimzia OR CDP870 OR "CDP 870")                                                                                                                                                                                                                                                                                                                                                                | 2,702   |

|    |                                                                                                                                                                                                                                                                                                                                                                                                                                                                                                                                            |           |
|----|--------------------------------------------------------------------------------------------------------------------------------------------------------------------------------------------------------------------------------------------------------------------------------------------------------------------------------------------------------------------------------------------------------------------------------------------------------------------------------------------------------------------------------------------|-----------|
| 7  | TS=(golimumab OR "CNTO-148" OR "CNTO 148" OR Simponi)                                                                                                                                                                                                                                                                                                                                                                                                                                                                                      | 3,173     |
| 8  | #2 OR #3 OR #4 OR #5 OR #6 OR #7                                                                                                                                                                                                                                                                                                                                                                                                                                                                                                           | 53,983    |
| 9  | TS=("AMG 108" OR AMG108 OR AMG-108)                                                                                                                                                                                                                                                                                                                                                                                                                                                                                                        | 8         |
| 10 | TS=(Canakinumab OR ilaris OR ACZ-885 OR ACZ885)                                                                                                                                                                                                                                                                                                                                                                                                                                                                                            | 1,413     |
| 11 | TS=(Iutikizumab OR ABT-981)                                                                                                                                                                                                                                                                                                                                                                                                                                                                                                                | 21        |
| 12 | TS=("Interleukin 1 Receptor Antagonist Protein" OR Anakinra OR IL-1Ra OR "Urine IL-1 Inhibitor" OR Anril O R Kineret OR "Urine Derived IL1 Inhibitor" OR "Urine-Derived IL1 Inhibitor" OR "IL1 Febrile Inhibitor")                                                                                                                                                                                                                                                                                                                         | 12,104    |
| 13 | TS=(gevokizumab OR "XOMA 052" OR XOMA052 OR XOMA-052 OR "XMA005.2" OR "XMA 005.2" OR "XMA -005.2")                                                                                                                                                                                                                                                                                                                                                                                                                                         | 102       |
| 14 | TS=("antagonists and inhibitors" OR "inhibitor" OR "antagonist" OR "blocker" OR "inhibitors" OR "antagonist s" OR "blockers")                                                                                                                                                                                                                                                                                                                                                                                                              | 2,626,051 |
| 15 | TS=(interleukin-17 OR "Interleukin 17" OR CTLA-8 OR IL-17 OR Interleukin-17F OR "Interleukin 17F" OR IL-1 7F OR "Cytokine ML-1" OR "Cytokine ML 1" OR Interleukin-17C OR "Interleukin 17C" OR IL-17C OR "Cytokine CX2" OR Interleukin-17E OR "Interleukin 17E" OR Interleukin-25 OR "Interleukin 25" OR IL-17E OR "IL 17E" OR Interleukin-17A OR "Interleukin 17A" OR "Cytotoxic T lymphocyte-Associated Antigen 8" OR "Cytotoxic T lymphocyte Associated Antigen 8" OR IL-17A OR CTLA8 OR Interleukin-17B OR "Interleukin 17B" OR IL-17B) | 39,603    |

|           |                                                                                                                                                                                                                                                                                                                                                                                                                                                                                                                                                                                                                                                        |         |
|-----------|--------------------------------------------------------------------------------------------------------------------------------------------------------------------------------------------------------------------------------------------------------------------------------------------------------------------------------------------------------------------------------------------------------------------------------------------------------------------------------------------------------------------------------------------------------------------------------------------------------------------------------------------------------|---------|
| <b>16</b> | TS=(interleukin-6 OR "interleukin 6" OR IL6 OR "B-Cell Stimulatory Factor 2" OR "B-Cell Stimulatory Factor-2" OR "B-Cell Differentiation Factor-2" OR "B-Cell Differentiation Factor 2" OR BSF-2 OR "Hybridoma Growth Factor" OR "IFNbeta 2" OR "Plasmacytoma Growth Factor" OR "Hepatocyte-Stimulating Factor" OR "Hepatocyte Stimulating Factor" OR MGI-2 OR "Myeloid DifferentiationInducing Protein" OR "Myeloid Differentiation Inducing Protein" OR "B-Cell Differentiation Factor" OR "B Cell Differentiation Factor" OR IL-6 OR "Interferon beta-2" OR "Interferon be ta 2" OR "B Cell Stimulatory Factor-2" OR "B Cell Stimulatory Factor 2") | 213,294 |
| <b>17</b> | TS=(interleukins OR interleukin)                                                                                                                                                                                                                                                                                                                                                                                                                                                                                                                                                                                                                       | 552,883 |
| <b>18</b> | (#15 OR #16 OR #17) AND #14                                                                                                                                                                                                                                                                                                                                                                                                                                                                                                                                                                                                                            | 119,490 |
| <b>19</b> | TS=(tocilizumab OR RHPM-1 OR RG-1569 OR R-1569 OR MSB11456 OR MSB-11456 OR atlizumab OR RO4877533 OR Actemra OR roactemra)                                                                                                                                                                                                                                                                                                                                                                                                                                                                                                                             | 7,761   |
| <b>20</b> | TS=(sarilumab OR SAR-153191 OR SAR153191 OR Kevzara OR REGN-88 OR REGN88)                                                                                                                                                                                                                                                                                                                                                                                                                                                                                                                                                                              | 394     |
| <b>21</b> | TS=(ALX-0061 OR vobarilizumab)                                                                                                                                                                                                                                                                                                                                                                                                                                                                                                                                                                                                                         | 20      |
| <b>22</b> | TS=(SANT-7 OR SANT7)                                                                                                                                                                                                                                                                                                                                                                                                                                                                                                                                                                                                                                   | 37      |
| <b>23</b> | TS=(satralizumab)                                                                                                                                                                                                                                                                                                                                                                                                                                                                                                                                                                                                                                      | 45      |
| <b>24</b> | TS=(siltuximab OR CLLB8 OR "cCIB8 monoclonal antibody" OR Sylvant OR CNTO-328 OR "monoclonal anti body CNTO-328" OR "CNTO 328 monoclonal antibody" OR "monoclonal antibody CNTO 328" OR "monoclo nal antibody CNTO328")                                                                                                                                                                                                                                                                                                                                                                                                                                | 352     |
| <b>25</b> | TS=(sirukumab OR CNTO-136 OR "CNTO 136")                                                                                                                                                                                                                                                                                                                                                                                                                                                                                                                                                                                                               | 135     |

|    |                                                                                                                           |         |
|----|---------------------------------------------------------------------------------------------------------------------------|---------|
| 26 | TS=(clazakizumab OR ALD-518 OR ALD518 OR BMS-945429)                                                                      | 66      |
| 27 | TS=(olokizumab OR CDP-6038 OR CDP6038)                                                                                    | 35      |
| 28 | TS=(Secukinumab OR Cosentyx OR "AIN 457" OR AIN457 OR AIN-457)                                                            | 2,469   |
| 29 | TS=(Ixekezumab OR Taltz OR LY2439821 OR LY-2439821)                                                                       | 1,075   |
| 30 | TS=(Brodalumab OR Siliq OR KHK-4827 OR KHK4827 OR AMG-827 OR "AMG 827")                                                   | 514     |
| 31 | #9 OR #10 OR #11 OR #12 OR #13 OR #18 OR #19 OR #20 OR #21 OR #22 OR #23 OR #24 OR #25 OR #26 OR #27 OR #28 OR #29 OR #30 | 132,395 |
| 32 | TS=(Randomized controlled trial)                                                                                          | 577,604 |
| 33 | TS=(observational study)                                                                                                  | 227,380 |
| 34 | (#8 OR #31) AND #1 AND (#32 OR #33)                                                                                       | 102     |

### Embase

| No. | Query                                                                                                                                                                                                                                                                                                                                                                                                                                 | Results |
|-----|---------------------------------------------------------------------------------------------------------------------------------------------------------------------------------------------------------------------------------------------------------------------------------------------------------------------------------------------------------------------------------------------------------------------------------------|---------|
| 1   | ('osteoarthritis'/exp OR 'osteoarthritis' OR osteoarthritis:ti,ab,kw OR osteoarthritis:ti,ab,kw OR osteoarthritis:ti,ab,kw OR osteoarthritis:ti,ab,kw OR osteoarthritis:ti,ab,kw OR arthrosis:ti,ab,kw OR arthroses:ti,ab,kw) AND [english]/lim                                                                                                                                                                                       | 141327  |
| 2   | 'tumor necrosis factor inhibitor'/exp OR 'tumor necrosis factor inhibitor*':ti,ab,kw OR 'tnf antagonist*':ti,ab,kw OR 'tnf inhibitor*':ti,ab,kw OR 'tnf blocker*':ti,ab,kw OR 'tumor necrosis factor antagonist*':ti,ab,kw OR 'tumor necrosis factor blocker*':ti,ab,kw OR 'tumor necrosis factor-alpha inhibitor*':ti,ab,kw OR 'tumor necrosis factor-alpha blocker*':ti,ab,kw OR 'tumor necrosis factor-alpha antagonist*':ti,ab,kw | 96024   |
| 3   | 'adalimumab'/exp OR adalimumab:ti,ab,kw OR humira:ti,ab,kw OR amjevita:ti,ab,kw OR cyltezo:ti,ab,kw OR 'adalimumab adbm':ti,ab,kw OR 'adalimumab atto':ti,ab,kw                                                                                                                                                                                                                                                                       | 34607   |

|    |                                                                                                                                                                                                                                                                                                                                                                                                                                                                                                                                                                                                                             |       |
|----|-----------------------------------------------------------------------------------------------------------------------------------------------------------------------------------------------------------------------------------------------------------------------------------------------------------------------------------------------------------------------------------------------------------------------------------------------------------------------------------------------------------------------------------------------------------------------------------------------------------------------------|-------|
| 4  | 'infiximab'/exp OR infiximab:ti,ab,kw OR 'sb2 infliximab':ti,ab,kw OR renflexis:ti,ab,kw OR inflectra:ti,ab,kw OR remicade:ti,ab,kw OR 'monoclonal antibody ca2':ti,ab,kw OR 'mab ca2':ti,ab,kw OR 'infiximab abda':ti,ab,kw OR 'infiximab dyyb':ti,ab,kw                                                                                                                                                                                                                                                                                                                                                                   | 52156 |
| 5  | 'etanercept'/exp OR etanercept:ti,ab,kw OR humira:ti,ab,kw OR 'tnr 001':ti,ab,kw OR 'tnr receptor fusion protein':ti,ab,kw OR 'tnfr-fc fusion protein':ti,ab,kw OR 'tnfr fc fusion protein':ti,ab,kw OR 'tntr-fc':ti,ab,kw OR 'tnr-001':ti,ab,kw OR 'tnr001':ti,ab,kw OR 'etanercept-szzs':ti,ab,kw OR 'tnf receptor type ii-igg fusion protein':ti,ab,kw OR 'tnf receptor type ii igg fusion protein':ti,ab,kw OR 'erelzi':ti,ab,kw OR 'enbrel':ti,ab,kw OR 'recombinant human dimeric tnfr receptor type ii-igg fusion protein':ti,ab,kw OR 'recombinant human dimeric tnfr receptor type ii igg fusion protein':ti,ab,kw | 32874 |
| 6  | 'golimumab'/exp OR golimumab:ti,ab,kw OR 'cnto-148':ti,ab,kw OR 'cnto 148':ti,ab,kw OR simponi:ti,ab,kw                                                                                                                                                                                                                                                                                                                                                                                                                                                                                                                     | 7120  |
| 7  | #2 OR #3 OR #4 OR #5 OR #6                                                                                                                                                                                                                                                                                                                                                                                                                                                                                                                                                                                                  | 97397 |
| 8  | 'amg 108'/exp OR 'amg 108':ti,ab,kw OR amg108:ti,ab,kw                                                                                                                                                                                                                                                                                                                                                                                                                                                                                                                                                                      | 46    |
| 9  | 'canakinumab'/exp OR canakinumab:ti,ab,kw OR ilaris:ti,ab,kw OR 'acz 885':ti,ab,kw OR acz885:ti,ab,kw                                                                                                                                                                                                                                                                                                                                                                                                                                                                                                                       | 3226  |
| 10 | 'lutikizumab'/exp OR lutikizumab:ti,ab,kw OR 'abt 981':ti,ab,kw                                                                                                                                                                                                                                                                                                                                                                                                                                                                                                                                                             | 39    |
| 11 | 'gevokizumab'/exp OR gevokizumab:ti,ab,kw OR xoma052:ti,ab,kw OR 'xoma 052':ti,ab,kw                                                                                                                                                                                                                                                                                                                                                                                                                                                                                                                                        | 263   |
| 12 | #8 OR #9 OR #10 OR #11                                                                                                                                                                                                                                                                                                                                                                                                                                                                                                                                                                                                      | 3406  |
| 13 | 'interleukin 17'/exp OR 'interleukin 17':ti,ab,kw OR interleukin17:ti,ab,kw OR 'ctla 8':ti,ab,kw OR 'il 17':ti,ab,kw OR ctla8:ti,ab,kw                                                                                                                                                                                                                                                                                                                                                                                                                                                                                      | 55181 |

|    |                                                                                                                                                                                                                                                                                                                                                                                                                                                                                                                                        |         |
|----|----------------------------------------------------------------------------------------------------------------------------------------------------------------------------------------------------------------------------------------------------------------------------------------------------------------------------------------------------------------------------------------------------------------------------------------------------------------------------------------------------------------------------------------|---------|
| 14 | 'interleukin 6'/exp OR 'interleukin 6':ti,ab,kw OR il6:ti,ab,kw OR 'il 6':ti,ab,kw OR interleukin6:ti,ab,kw OR 'b cell stimulatory factor 2':ti,ab,kw OR 'bsf 2':ti,ab,kw OR 'b cell differentiation factor 2':ti,ab,kw OR 'hybridoma growth factor*':ti,ab,kw OR 'ifn-beta 2':ti,ab,kw OR 'plasmacytoma growth factor*':ti,ab,kw OR 'mgi 2':ti,ab,kw OR 'hepatocyte stimulating factor*':ti,ab,kw OR 'myeloid differentiation inducing protein':ti,ab,kw OR 'b cell differentiation factor*':ti,ab,kw OR 'interferon beta 2':ti,ab,kw | 276123  |
| 15 | 'interleukin derivative'/exp OR 'interleukin derivative':ti,ab,kw OR interleukin*:ti,ab,kw                                                                                                                                                                                                                                                                                                                                                                                                                                             | 299170  |
| 16 | antagonist* OR inhibitor* OR blocker*                                                                                                                                                                                                                                                                                                                                                                                                                                                                                                  | 2664028 |
| 17 | #13 OR #14 OR #15                                                                                                                                                                                                                                                                                                                                                                                                                                                                                                                      | 490151  |
| 18 | #16 AND #17                                                                                                                                                                                                                                                                                                                                                                                                                                                                                                                            | 102301  |
| 19 | 'sarilumab'/exp OR sarilumab:ti,ab,kw OR 'sar-153191':ti,ab,kw OR sar153191:ti,ab,kw OR kevzara:ti,ab,kw OR 'regn-88':ti,ab,kw OR regn88:ti,ab,kw                                                                                                                                                                                                                                                                                                                                                                                      | 717     |
| 20 | 'vobarilizumab'/exp OR 'alx-0061':ti,ab,kw                                                                                                                                                                                                                                                                                                                                                                                                                                                                                             | 58      |
| 21 | 'sant7':ti,ab,kw OR 'sant-7':ti,ab,kw                                                                                                                                                                                                                                                                                                                                                                                                                                                                                                  | 18      |
| 22 | 'satralizumab'/exp OR 'satralizumab':ti,ab,kw                                                                                                                                                                                                                                                                                                                                                                                                                                                                                          | 74      |
| 23 | 'sirukumab'/exp OR sirukumab:ti,ab,kw OR 'cnto-136':ti,ab,kw OR 'cnto 136':ti,ab,kw                                                                                                                                                                                                                                                                                                                                                                                                                                                    | 315     |
| 24 | 'siltuximab'/exp OR 'siltuximab':ti,ab,kw OR cllb8:ti,ab,kw OR 'cclb8 monoclonal antibody':ti,ab,kw OR 'sylvant':ti,ab,kw OR 'cnto-328':ti,ab,kw OR 'monoclonal antibody cnto-328':ti,ab,kw OR 'cnto 328 monoclonal antibody':ti,ab,kw OR 'monoclonal antibody cnto 328':ti,ab,kw OR 'monoclonal antibody cnto328':ti,ab,kw                                                                                                                                                                                                            | 815     |
| 25 | 'clazakizumab'/exp OR clazakizumab:ti,ab,kw OR 'ald-518':ti,ab,kw OR ald518:ti,ab,kw OR 'bms-945429':ti,ab,kw                                                                                                                                                                                                                                                                                                                                                                                                                          | 202     |

|    |                                                                                                                                                                                                                                                                                       |         |
|----|---------------------------------------------------------------------------------------------------------------------------------------------------------------------------------------------------------------------------------------------------------------------------------------|---------|
| 26 | 'olokizumab'/exp OR olokizumab:ti,ab,kw OR 'cdp-6038':ti,ab,kw OR cdp6038:ti,ab,kw                                                                                                                                                                                                    | 87      |
| 27 | #19 OR #20 OR #21 OR #22 OR #23 OR #24 OR #25 OR #26                                                                                                                                                                                                                                  | 1897    |
| 28 | 'secukinumab'/exp OR secukinumab:ti,ab,kw OR 'co-sentyx':ti,ab,kw OR ain457:ti,ab,kw OR 'ain 457':ti,ab,kw OR 'ain-457':ti,ab,kw                                                                                                                                                      | 3830    |
| 29 | 'ixekizumab'/exp OR ixekizumab:ti,ab,kw OR 'taltz':ti,ab,kw OR ly2439821:ti,ab,kw OR 'ly-2439821':ti,ab,kw                                                                                                                                                                            | 1849    |
| 30 | 'brodalumab'/exp OR 'brodalumab':ti,ab,kw OR siliq:ti,ab,kw OR 'khk-4827':ti,ab,kw OR 'khk4827':ti,ab,kw OR 'amg-827':ti,ab,kw OR 'amg 827':ti,ab,kw                                                                                                                                  | 1140    |
| 31 | #28 OR #29 OR #30                                                                                                                                                                                                                                                                     | 4929    |
| 32 | 'randomized controlled trial'/exp OR 'randomized controlled trial':ti,ab,it OR 'randomized':ti,ab,it OR 'randomised':ti,ab,it OR 'randomization':ti,ab,it OR 'randomisation':ti,ab,it OR rct:ti,ab,it OR 'randomly':ti,ab,it OR placebo:ti,ab,it                                      | 1511619 |
| 33 | 'observational study'/exp OR 'non experimental studies':ti,ab,kw OR 'non experimental study':ti,ab,kw OR 'nonexperimental studies':ti,ab,kw OR 'nonexperimental study':ti,ab,kw OR 'observation study':ti,ab,kw OR 'observational studies':ti,ab,kw OR 'observational study':ti,ab,kw | 262151  |
| 34 | #32 OR #33                                                                                                                                                                                                                                                                            | 1743673 |
| 35 | #1 AND #34                                                                                                                                                                                                                                                                            | 17785   |
| 36 | 'interleukin 1 receptor blocking agent'/exp OR 'interleukin 1 receptor blocking agent':ti,ab,kw OR anakinra:ti,ab,kw OR 'il 1ra':ti,ab,kw OR 'urine il-1 inhibitor*':ti,ab,kw OR an-tril:ti,ab,kw OR kineret:ti,ab,kw                                                                 | 18428   |
| 37 | #12 OR #36                                                                                                                                                                                                                                                                            | 20995   |
| 38 | #7 OR #18 OR #27 OR #31 OR #37                                                                                                                                                                                                                                                        | 207670  |



|    |             |     |
|----|-------------|-----|
| 39 | #35 AND #38 | 398 |
|----|-------------|-----|

### CENTRAL

| No. | Query                                                                                                                                                                                                                                                                                                                | Results |
|-----|----------------------------------------------------------------------------------------------------------------------------------------------------------------------------------------------------------------------------------------------------------------------------------------------------------------------|---------|
| 1   | MeSH descriptor: [Osteoarthritis] explode all trees                                                                                                                                                                                                                                                                  | 7458    |
| 2   | osteoarthritis:ti,ab,kw or "Osteoarthritis":ti,ab,kw or "Osteoarthrosis":ti,ab,kw or "Osteoarthroses":ti,ab,kw or "Arthrosis":ti,ab,kw or "Arthroses":ti,ab,kw                                                                                                                                                       | 17853   |
| 3   | MeSH descriptor: [Randomized Controlled Trial] explode all trees                                                                                                                                                                                                                                                     | 118     |
| 4   | MeSH descriptor: [Random Allocation] explode all trees                                                                                                                                                                                                                                                               | 20604   |
| 5   | "randomized":ti,ab,kw OR "randomised":ti,ab,kw OR "randomization":ti,ab,kw OR "randomisation":ti,ab,kw OR "randomly":ti,ab,kw OR "placebo":ti,ab,kw OR "trial":ti,ab,kw OR "Random Allocation":ti,ab,kw OR "Randomized Controlled Trial":ti,ab,kw OR "observational study":ti,ab,kw                                  | 1168382 |
| 6   | MeSH descriptor: [Observational Study] explode all trees                                                                                                                                                                                                                                                             | 3       |
| 7   | #1 OR #2                                                                                                                                                                                                                                                                                                             | 17853   |
| 8   | #3 OR #4 OR #5 OR #6                                                                                                                                                                                                                                                                                                 | 1168382 |
| 9   | #7 AND #8                                                                                                                                                                                                                                                                                                            | 14195   |
| 10  | MeSH descriptor: [Tumor Necrosis Factor Inhibitors] explode all trees                                                                                                                                                                                                                                                | 36      |
| 11  | "Tumor Necrosis Factor Inhibitor*":ti,ab,kw or "TNF Antagonist*":ti,ab,kw or "TNF Inhibitor*":ti,ab,kw or "TNF Blocker*":ti,ab,kw or "Tumor Necrosis Factor Antagonist*":ti,ab,kw or "Tumor Necrosis Factor Blocker*":ti,ab,kw or "Tumor Necrosis Factor-alpha Antagonist*":ti,ab,kw or "Tumor Necrosis Factor-alpha | 1018    |

|           |                                                                                                                                                                                                                                                                                                                                                                                                                                                                                                                            |      |
|-----------|----------------------------------------------------------------------------------------------------------------------------------------------------------------------------------------------------------------------------------------------------------------------------------------------------------------------------------------------------------------------------------------------------------------------------------------------------------------------------------------------------------------------------|------|
|           | Inhibitor*:ti,ab,kw or "Tumor Necrosis Factor-alpha Blocker*:ti,ab,kw                                                                                                                                                                                                                                                                                                                                                                                                                                                      |      |
| <b>12</b> | #10 OR #11                                                                                                                                                                                                                                                                                                                                                                                                                                                                                                                 | 1041 |
| <b>13</b> | #9 AND #12                                                                                                                                                                                                                                                                                                                                                                                                                                                                                                                 | 9    |
| <b>14</b> | MeSH descriptor: [Adalimumab] explode all trees                                                                                                                                                                                                                                                                                                                                                                                                                                                                            | 744  |
| <b>15</b> | Adalimumab:ti,ab,kw OR "Humira":ti,ab,kw OR "Am-jevita":ti,ab,kw OR "Cyltezo":ti,ab,kw OR "Adalimumabadbm":ti,ab,kw OR "Adalimumab-atto":ti,ab,kw                                                                                                                                                                                                                                                                                                                                                                          | 3004 |
| <b>16</b> | #14 OR #15                                                                                                                                                                                                                                                                                                                                                                                                                                                                                                                 | 3004 |
| <b>17</b> | MeSH descriptor: [Infliximab] explode all trees                                                                                                                                                                                                                                                                                                                                                                                                                                                                            | 722  |
| <b>18</b> | Infliximab:ti,ab,kw OR "SB2 infliximab":ti,ab,kw OR "Renflexis":ti,ab,kw OR "Inflectra":ti,ab,kw OR "Remicade":ti,ab,kw OR "Monoclonal Antibody cA2":ti,ab,kw OR "MAb cA2":ti,ab,kw OR "Infliximababda":ti,ab,kw OR "Infliximab-dyyb":ti,ab,kw                                                                                                                                                                                                                                                                             | 2306 |
| <b>19</b> | #17 OR #18                                                                                                                                                                                                                                                                                                                                                                                                                                                                                                                 | 2306 |
| <b>20</b> | MeSH descriptor: [Etanercept] explode all trees                                                                                                                                                                                                                                                                                                                                                                                                                                                                            | 758  |
| <b>21</b> | "Etanercept":ti,ab,kw OR "TNFR-Fc Fusion Protein":ti,ab,kw OR "TNFR Fc Fusion Protein":ti,ab,kw OR "TNR 001":ti,ab,kw OR "TNT Receptor Fusion Protein":ti,ab,kw OR "TNTR-Fc":ti,ab,kw OR "TNR-001":ti,ab,kw OR "TNR001":ti,ab,kw OR "Etanercept-szsz":ti,ab,kw OR "TNF Receptor Type II-IgG Fusion Protein":ti,ab,kw OR "TNF Receptor Type II IgG Fusion Protein":ti,ab,kw OR "Erelzi":ti,ab,kw OR "Enbrel":ti,ab,kw OR "Recombinant Human Dimeric TNF Receptor Type II-IgG Fusion Protein":ti,ab,kw OR "Recombinant Human | 2187 |

|           |                                                                                                                                                                                |      |
|-----------|--------------------------------------------------------------------------------------------------------------------------------------------------------------------------------|------|
|           | Dimeric TNF Receptor Type II IgG Fusion Protein":ti,ab,kw                                                                                                                      |      |
| <b>22</b> | #20 OR #21                                                                                                                                                                     | 2187 |
| <b>23</b> | MeSH descriptor: [Certolizumab Pegol] explode all trees                                                                                                                        | 170  |
| <b>24</b> | Certolizumab Pegol:ti,ab,kw OR "Cimzia":ti,ab,kw OR "CDP870 ":ti,ab,kw OR "CDP 870":ti,ab,kw                                                                                   | 587  |
| <b>25</b> | #23 OR #24                                                                                                                                                                     | 587  |
| <b>26</b> | golimumab:ti,ab,kw OR "CNTO-148":ti,ab,kw OR "CNTO 148 ":ti,ab,kw OR "Simponi ":ti,ab,kw                                                                                       | 54   |
| <b>27</b> | #12 OR #16 OR #19 OR #22 OR #25 OR #26                                                                                                                                         | 7375 |
| <b>28</b> | "AMG 108":ti,ab,kw OR "AMG-108":ti,ab,kw OR "AMG108":ti,ab,kw                                                                                                                  | 8    |
| <b>29</b> | "Canakinumab":ti,ab,kw OR "ilaris":ti,ab,kw OR "ACZ-885":ti,ab,kw OR "ACZ885":ti,ab,kw                                                                                         | 308  |
| <b>30</b> | lutikizumab:ti,ab,kw OR "ABT-981":ti,ab,kw                                                                                                                                     | 8    |
| <b>31</b> | gevokizumab:ti,ab,kw OR "gevokizumab":ti,ab,kw OR "XOMA 052":ti,ab,kw OR " XOMA052":ti,ab,kw OR "XOMA-052":ti,ab,kw                                                            | 33   |
| <b>32</b> | MeSH descriptor: [Interleukin 1 Receptor Antagonist Protein] explode all trees                                                                                                 | 307  |
| <b>33</b> | "Interleukin 1 Receptor Antagonist Protein":ti,ab,kw OR "Anakinra":ti,ab,kw OR "IL-1Ra":ti,ab,kw OR "Urine IL-1 Inhibitor":ti,ab,kw OR "Antril":ti,ab,kw OR "Kineret":ti,ab,kw | 519  |
| <b>34</b> | #28 OR #29 OR #30 OR #31 OR #32 OR #33                                                                                                                                         | 851  |

|    |                                                                                                                                                                                                                                                                                                                                                                                                                                                                                                                                                                                                                                                                                                                                                                                                                                                                             |       |
|----|-----------------------------------------------------------------------------------------------------------------------------------------------------------------------------------------------------------------------------------------------------------------------------------------------------------------------------------------------------------------------------------------------------------------------------------------------------------------------------------------------------------------------------------------------------------------------------------------------------------------------------------------------------------------------------------------------------------------------------------------------------------------------------------------------------------------------------------------------------------------------------|-------|
| 35 | "antagonists and inhibitors":ti,ab,kw OR "inhibitor*":ti,ab,kw OR "antagonist*":ti,ab,kw OR "blocker*":ti,ab,kw                                                                                                                                                                                                                                                                                                                                                                                                                                                                                                                                                                                                                                                                                                                                                             | 79776 |
| 36 | MeSH descriptor: [Interleukin-17] explode all trees                                                                                                                                                                                                                                                                                                                                                                                                                                                                                                                                                                                                                                                                                                                                                                                                                         | 167   |
| 37 | "interleukin 17":ti,ab,kw OR "CTLA-8":ti,ab,kw OR "IL-17":ti,ab,kw OR "CTLA8":ti,ab,kw OR "interleukin-17":ti,ab,kw                                                                                                                                                                                                                                                                                                                                                                                                                                                                                                                                                                                                                                                                                                                                                         | 1777  |
| 38 | MeSH descriptor: [Interleukin-6] explode all trees                                                                                                                                                                                                                                                                                                                                                                                                                                                                                                                                                                                                                                                                                                                                                                                                                          | 3022  |
| 39 | "interleukin-6":ti,ab,kw OR "interleukin 6":ti,ab,kw OR "IL6":ti,ab,kw OR "IL-6":ti,ab,kw OR "b cell stimulatory factor 2":ti,ab,kw OR "b cell stimulatory factor-2":ti,ab,kw OR "BSF-2":ti,ab,kw OR "b cell differentiation factor 2":ti,ab,kw OR "b cell differentiation factor-2":ti,ab,kw OR "Hybridoma Growth Factor":ti,ab,kw OR "IFN-beta 2":ti,ab,kw OR "Plasmacytoma Growth Factor":ti,ab,kw OR "MGI-2":ti,ab,kw OR "hepatocyte stimulating factor":ti,ab,kw OR "hepatocyte-stimulating factor":ti,ab,kw OR "myeloid differentiation-inducing protein":ti,ab,kw OR "myeloid differentiation inducing protein":ti,ab,kw OR "b-cell differentiation factor":ti,ab,kw OR "b cell differentiation factor":ti,ab,kw OR "interferon beta 2":ti,ab,kw OR "interferon beta-2":ti,ab,kw OR "b cell stimulatory factor 2":ti,ab,kw OR "b cell stimulatory factor-2":ti,ab,kw | 15947 |
| 40 | MeSH descriptor: [Interleukins] explode all trees                                                                                                                                                                                                                                                                                                                                                                                                                                                                                                                                                                                                                                                                                                                                                                                                                           | 6291  |
| 41 | interleukin*:ti,ab,kw                                                                                                                                                                                                                                                                                                                                                                                                                                                                                                                                                                                                                                                                                                                                                                                                                                                       | 19901 |
| 42 | #35 AND (#36 OR #37 OR #38 OR #39 OR #40 OR #41)                                                                                                                                                                                                                                                                                                                                                                                                                                                                                                                                                                                                                                                                                                                                                                                                                            | 2942  |
| 43 | "sarilumab":ti,ab,kw OR "SAR-153191":ti,ab,kw OR "SAR153191":ti,ab,kw OR "Kevzara":ti,ab,kw OR "REGN-88":ti,ab,kw OR "REGN88":ti,ab,kw OR "TNR-001":ti,ab,kw OR "TNR001":ti,ab,kw OR "Etanerceptszs":ti,ab,kw OR "TNF Receptor Type II-IgG Fusion Protein":ti,ab,kw                                                                                                                                                                                                                                                                                                                                                                                                                                                                                                                                                                                                         | 239   |

|    |                                                                                                                                                                                                                                                                                                           |      |
|----|-----------------------------------------------------------------------------------------------------------------------------------------------------------------------------------------------------------------------------------------------------------------------------------------------------------|------|
| 44 | "ALX-0061":ti,ab,kw OR "vobarilizumab":ti,ab,kw                                                                                                                                                                                                                                                           | 17   |
| 45 | "SANT-7":ti,ab,kw OR "SANT7":ti,ab,kw                                                                                                                                                                                                                                                                     | 0    |
| 46 | "satralizumab":ti,ab,kw                                                                                                                                                                                                                                                                                   | 23   |
| 47 | "sirukumab":ti,ab,kw OR "CNTO-136":ti,ab,kw OR "CNTO 136":ti,ab,kw                                                                                                                                                                                                                                        | 108  |
| 48 | "siltuximab":ti,ab,kw OR "CLLB8":ti,ab,kw OR "cCIB8 monoclonal antibody":ti,ab,kw OR "Sylvant":ti,ab,kw OR "CNTO-328":ti,ab,kw OR "monoclonal antibody CNTO-328":ti,ab,kw OR "CNTO 328 monoclonal antibody":ti,ab,kw OR "monoclonal antibody CNTO 328":ti,ab,kw OR "monoclonal antibody CNTO328":ti,ab,kw | 68   |
| 49 | "clazakizumab":ti,ab,kw OR "ALD-518":ti,ab,kw OR "ALD518":ti,ab,kw OR "BMS-945429":ti,ab,kw                                                                                                                                                                                                               | 37   |
| 50 | "olokizumab":ti,ab,kw OR "CDP-6038":ti,ab,kw OR "CDP6038":ti,ab,kw                                                                                                                                                                                                                                        | 34   |
| 51 | "tocilizumab":ti,ab,kw OR "RHPM-1":ti,ab,kw OR "RG-1569":ti,ab,kw OR "R-1569":ti,ab,kw OR "MSB11456":ti,ab,kw OR "MSB-11456":ti,ab,kw OR "atlizumab":ti,ab,kw OR "RO-4877533":ti,ab,kw OR "Actemra":ti,ab,kw OR "roactemra":ti,ab,kw                                                                      | 1073 |
| 52 | #43 OR #44 OR #45 OR #46 OR #47 OR #48 OR #49 OR #50 OR #51                                                                                                                                                                                                                                               | 1545 |
| 53 | "Secukinumab":ti,ab,kw OR "Cosentyx":ti,ab,kw OR "AIN 457":ti,ab,kw OR "AIN457":ti,ab,kw OR "AIN-457":ti,ab,kw                                                                                                                                                                                            | 837  |
| 54 | "Ixekezumab":ti,ab,kw OR "Taltz":ti,ab,kw OR "LY2439821":ti,ab,kw OR "LY-2439821":ti,ab,kw                                                                                                                                                                                                                | 421  |
| 55 | "Brodalumab":ti,ab,kw OR "Siliq":ti,ab,kw OR "KHK-4827":ti,ab,kw OR "KHK4827":ti,ab,kw OR "AMG-827":ti,ab,kw OR "AMG 827":ti,ab,kw                                                                                                                                                                        | 165  |
| 56 | #53 OR #54 OR #55                                                                                                                                                                                                                                                                                         | 1397 |

|           |                                 |       |
|-----------|---------------------------------|-------|
| <b>57</b> | #27 OR #34 OR #42 OR #52 OR #56 | 12573 |
| <b>58</b> | #9 AND #57                      | 124   |

**Table S3. A hierarchy list of data extraction.**

| Primary outcome             | Rank                                                     |
|-----------------------------|----------------------------------------------------------|
| Pain                        | (1) VAS global pain score                                |
|                             | (2) Pain during activities or at test                    |
|                             | (3) WOMAC pain subscale                                  |
|                             | (4) AUSCAN pain subscale                                 |
|                             | (5) Other composite pain score                           |
|                             | (6) Patients' global assessment                          |
|                             | (7) Physicians' global assessment                        |
| Physical function/Stiffness | (1) WOMAC physical function/stiffness subscale           |
|                             | (2) AUSCAN physical function/stiffness subscale          |
|                             | (3) Other composite physical function/stiffness subscale |
|                             | (4) patients' global assessment                          |
|                             | (5) physicians' global assessment                        |

WOMAC, Western Ontario and McMaster Universities Osteoarthritis Index; AUSCAN, Australian/Canadian Hand Osteoarthritis Index

**Table S4. Rank probability of pain.**

| Drug        | Rank 1 | Rank 2 | Rank 3 | Rank 4 | Rank 5 | Rank 6 | Rank 7 | Rank 8 | Rank 9 | Rank 10 |
|-------------|--------|--------|--------|--------|--------|--------|--------|--------|--------|---------|
| Canakinumab | 0.79   | 0.14   | 0.03   | 0.01   | 0.01   | 0.01   | 0      | 0      | 0      | 0       |
| Naproxen    | 0.1    | 0.67   | 0.13   | 0.04   | 0.02   | 0.02   | 0.01   | 0.01   | 0      | 0       |
| Anakinra    | 0.07   | 0.08   | 0.19   | 0.09   | 0.1    | 0.13   | 0.09   | 0.13   | 0.12   | 0       |
| Placebo     | 0      | 0.02   | 0.3    | 0.37   | 0.21   | 0.08   | 0.02   | 0      | 0      | 0       |
| Lutikizumab | 0.02   | 0.04   | 0.17   | 0.23   | 0.22   | 0.18   | 0.08   | 0.05   | 0.02   | 0       |
| Tocilizumab | 0.02   | 0.03   | 0.07   | 0.12   | 0.22   | 0.22   | 0.16   | 0.12   | 0.05   | 0       |
| HA          | 0.01   | 0.02   | 0.08   | 0.09   | 0.12   | 0.21   | 0.28   | 0.15   | 0.04   | 0       |
| Adalimumab  | 0      | 0.01   | 0.02   | 0.04   | 0.07   | 0.13   | 0.26   | 0.37   | 0.1    | 0       |
| Etanercept  | 0      | 0      | 0.01   | 0.01   | 0.02   | 0.04   | 0.09   | 0.17   | 0.65   | 0.01    |
| Infliximab  | 0      | 0      | 0      | 0      | 0      | 0      | 0      | 0      | 0.01   | 0.98    |

Rank 1 is the worst option; HA, hyaluronic acid

**Table S5. Rank probability of physical function.**

| Drug         | Rank 1 | Rank 2 | Rank 3 | Rank 4 | Rank 5 | Rank 6 | Rank 7 | Rank 8 |
|--------------|--------|--------|--------|--------|--------|--------|--------|--------|
| HA           | 0.46   | 0.32   | 0.08   | 0.05   | 0.03   | 0.03   | 0.03   | 0.01   |
| Cana-kinumab | 0.08   | 0.22   | 0.26   | 0.16   | 0.09   | 0.07   | 0.07   | 0.05   |
| Naproxen     | 0.05   | 0.12   | 0.24   | 0.22   | 0.13   | 0.09   | 0.08   | 0.06   |
| Placebo      | 0      | 0.02   | 0.07   | 0.2    | 0.3    | 0.27   | 0.12   | 0.02   |
| Adalimumab   | 0.01   | 0.04   | 0.12   | 0.13   | 0.16   | 0.19   | 0.21   | 0.15   |
| Tocilizumab  | 0.04   | 0.06   | 0.08   | 0.1    | 0.13   | 0.18   | 0.22   | 0.18   |
| Lutikizumab  | 0.03   | 0.06   | 0.09   | 0.11   | 0.12   | 0.14   | 0.21   | 0.24   |
| Etanercept   | 0.32   | 0.16   | 0.06   | 0.05   | 0.04   | 0.04   | 0.06   | 0.28   |

Rank 1 is the worst option; HA, hyaluronic acid

**Table S6. Rank probability of stiffness.**

| Drug         | Rank 1 | Rank 2 | Rank 3 | Rank 4 | Rank 5 | Rank 6 | Rank 7 |
|--------------|--------|--------|--------|--------|--------|--------|--------|
| Etanercept   | 0.3    | 0.08   | 0.06   | 0.05   | 0.05   | 0.1    | 0.36   |
| HA           | 0.2    | 0.23   | 0.14   | 0.12   | 0.12   | 0.13   | 0.05   |
| Adalimumab   | 0.09   | 0.2    | 0.22   | 0.17   | 0.17   | 0.11   | 0.04   |
| Placebo      | 0.03   | 0.07   | 0.17   | 0.22   | 0.26   | 0.2    | 0.05   |
| Naproxen     | 0.11   | 0.17   | 0.16   | 0.18   | 0.17   | 0.14   | 0.08   |
| Cana-kinumab | 0.21   | 0.2    | 0.18   | 0.16   | 0.12   | 0.08   | 0.05   |
| Lutikizumab  | 0.06   | 0.06   | 0.07   | 0.1    | 0.11   | 0.24   | 0.37   |

Rank 1 is the worst option; HA, hyaluronic acid

**Table S7. Network meta-analysis of stiffness for different interventions.**

| <b>HA</b>             | <b>-0.20<br/>(-3.20, 2.81)</b> | <b>-0.03<br/>(-5.47, 5.19)</b> | <b>-0.74<br/>(-7.43, 5.63)</b> | <b>-1.40<br/>(-7.00, 4.02)</b> | <b>-0.33<br/>(-5.81, 4.91)</b> | <b>-0.60<br/>(-5.07, 3.67)</b> |
|-----------------------|--------------------------------|--------------------------------|--------------------------------|--------------------------------|--------------------------------|--------------------------------|
| 0.20<br>(-2.81, 3.20) | <b>adalimumab</b>              | 0.17<br>(-4.19, 4.48)          | -0.55<br>(-7.70, 6.32)         | -1.20<br>(-5.81, 3.21)         | -0.14<br>(-4.52, 4.08)         | -0.40<br>(-3.59, 2.58)         |
| 0.03<br>(-5.19, 5.47) | -0.17<br>(-4.48, 4.19)         | <b>canakinumab</b>             | -0.70<br>(-8.95, 7.42)         | -1.39<br>(-5.93, 3.14)         | -0.30<br>(-3.39, 2.69)         | -0.57<br>(-3.65, 2.39)         |
| 0.74<br>(-5.63, 7.43) | 0.55<br>(-6.32, 7.70)          | 0.70<br>(-7.42, 8.95)          | <b>etanercept</b>              | -0.68<br>(-8.75, 7.71)         | 0.39<br>(-7.83, 8.77)          | 0.12<br>(-7.44, 7.92)          |
| 1.40<br>(-4.02, 7.00) | 1.20<br>(-3.21, 5.81)          | 1.39<br>(-3.14, 5.93)          | 0.68<br>(-7.71, 8.75)          | <b>lutikizumab</b>             | 1.10<br>(-3.44, 5.59)          | 0.81<br>(-2.54, 4.15)          |
| 0.33<br>(-4.91, 5.81) | 0.14<br>(-4.08, 4.52)          | 0.30<br>(-2.69, 3.39)          | -0.39<br>(-8.77, 7.83)         | -1.10<br>(-5.59, 3.44)         | <b>naproxen</b>                | -0.29<br>(-3.33, 2.89)         |
| 0.60<br>(-3.67, 5.07) | 0.40<br>(-2.58, 3.59)          | 0.57<br>(-2.39, 3.65)          | -0.12<br>(-7.92, 7.44)         | -0.81<br>(-4.15, 2.54)         | 0.29<br>(-2.89, 3.33)          | <b>placebo</b>                 |

HA, hyaluronic acid.



**Table S8. Network meta-analysis of AEs for different interventions.**

|                       |                      |                      |                      |                       |                        |                      |                      |                      |                        |                       |
|-----------------------|----------------------|----------------------|----------------------|-----------------------|------------------------|----------------------|----------------------|----------------------|------------------------|-----------------------|
| <b>AMG108</b>         | 0.94<br>(0.24, 3.80) | 0.67<br>(0.13, 3.29) | 0.42<br>(0.08, 2.13) | 1.27<br>(0.24, 7.01)  | 3.44<br>(0.19, 152.96) | 0.82<br>(0.19, 3.62) | 0.67<br>(0.13, 3.50) | 0.88<br>(0.28, 2.88) | 3.42<br>(0.11, 223.08) | 1.70<br>(0.30, 9.66)  |
| 1.07<br>(0.26, 4.24)  | <b>adalimumab</b>    | 0.72<br>(0.18, 2.59) | 0.45<br>(0.11, 1.75) | 1.34<br>(0.32, 5.87)  | 3.82<br>(0.24, 141.19) | 0.87<br>(0.28, 2.78) | 0.71<br>(0.17, 2.92) | 0.94<br>(0.43, 1.97) | 3.58<br>(0.14, 200.33) | 1.82<br>(0.41, 7.65)  |
| 1.49<br>(0.30, 7.46)  | 1.39<br>(0.39, 5.56) | <b>anakinra</b>      | 0.62<br>(0.13, 3.06) | 1.87<br>(0.37, 9.99)  | 5.12<br>(0.28, 209.25) | 1.21<br>(0.32, 4.96) | 1.00<br>(0.19, 5.03) | 1.30<br>(0.44, 4.10) | 5.03<br>(0.17, 300.73) | 2.50<br>(0.50, 14.16) |
| 2.38<br>(0.47, 11.94) | 2.22<br>(0.57, 8.99) | 1.62<br>(0.33, 7.81) | <b>Cana-kinumab</b>  | 3.02<br>(0.55, 16.45) | 8.18<br>(0.49, 345.91) | 1.93<br>(0.49, 7.89) | 1.59<br>(0.50, 4.88) | 2.10<br>(0.68, 6.67) | 8.00<br>(0.26, 440.09) | 4.02<br>(0.73, 21.70) |
| 0.79<br>(0.14, 4.22)  | 0.75<br>(0.17, 3.12) | 0.53<br>(0.10, 2.68) | 0.33<br>(0.06, 1.82) | <b>etanercept</b>     | 2.83<br>(0.14, 117.56) | 0.64<br>(0.15, 3.03) | 0.52<br>(0.09, 2.78) | 0.69<br>(0.20, 2.33) | 2.57<br>(0.10, 166.03) | 1.37<br>(0.22, 7.75)  |
| 0.29<br>(0.01, 5.18)  | 0.26<br>(0.01, 4.14) | 0.20<br>(0.00, 3.53) | 0.12<br>(0.00, 2.03) | 0.35<br>(0.01, 6.95)  | <b>infliximab</b>      | 0.22<br>(0.01, 3.85) | 0.19<br>(0.00, 3.37) | 0.25<br>(0.01, 3.70) | 0.94<br>(0.07, 17.66)  | 0.47<br>(0.01, 9.62)  |
| 1.23<br>(0.28, 5.38)  | 1.15<br>(0.36, 3.63) | 0.82<br>(0.20, 3.15) | 0.52<br>(0.13, 2.06) | 1.56<br>(0.33, 6.72)  | 4.45<br>(0.26, 157.45) | <b>lutikizumab</b>   | 0.83<br>(0.19, 3.46) | 1.08<br>(0.47, 2.55) | 4.13<br>(0.14, 236.51) | 2.09<br>(0.44, 9.17)  |
| 1.49<br>(0.29, 7.85)  | 1.40<br>(0.34, 5.88) | 1.00<br>(0.20, 5.38) | 0.63<br>(0.21, 2.01) | 1.91<br>(0.36, 11.01) | 5.18<br>(0.30, 209.79) | 1.20<br>(0.29, 5.29) | <b>naproxen</b>      | 1.31<br>(0.40, 4.50) | 5.03<br>(0.18, 299.50) | 2.55<br>(0.45, 14.00) |
| 1.13<br>(0.35, 3.63)  | 1.07<br>(0.51, 2.30) | 0.77<br>(0.24, 2.26) | 0.48<br>(0.15, 1.48) | 1.44<br>(0.43, 5.07)  | 4.08<br>(0.27, 141.60) | 0.93<br>(0.39, 2.14) | 0.76<br>(0.22, 2.48) | <b>placebo</b>       | 3.74<br>(0.16, 206.90) | 1.95<br>(0.54, 6.60)  |
| 0.29<br>(0.00, 8.94)  | 0.28<br>(0.00, 7.17) | 0.20<br>(0.00, 5.82) | 0.13<br>(0.00, 3.90) | 0.39<br>(0.01, 9.88)  | 1.06<br>(0.06, 13.68)  | 0.24<br>(0.00, 7.01) | 0.20<br>(0.00, 5.59) | 0.27<br>(0.00, 6.31) | <b>standard care</b>   | 0.52<br>(0.01, 16.39) |
| 0.59<br>(0.10, 3.30)  | 0.55<br>(0.13, 2.44) | 0.40<br>(0.07, 2.01) | 0.25<br>(0.05, 1.36) | 0.73<br>(0.13, 4.54)  | 2.12<br>(0.10, 84.43)  | 0.48<br>(0.11, 2.29) | 0.39<br>(0.07, 2.24) | 0.51<br>(0.15, 1.84) | 1.93<br>(0.06, 133.62) | <b>tocilizumab</b>    |

HA, hyaluronic acid; AEs, adverse events.

**Table S9. Sensitivity analysis in pain, stiffness and function.**

| Outcome                |                        | Intervention          | Std. Mean Difference (95% CI) |                             | I <sup>2</sup>     | P value |
|------------------------|------------------------|-----------------------|-------------------------------|-----------------------------|--------------------|---------|
|                        |                        |                       | Fixed model                   | Random model                |                    |         |
| Pain                   | Compared with placebo  | Adalimumab            | -0.16 (-0.42, 0.11)           | -0.16 (-0.42, 0.11)         | 0%                 | 0.77    |
|                        |                        | Lutikizumab           | -0.08 (-0.29, 0.12)           | -0.08 (-0.29, 0.14)         | 9%                 | 0.29    |
|                        |                        | Canakinumab           | <b>1.69 (1.20, 2.19)</b>      | <b>1.69 (1.20, 2.19)</b>    | NA                 | NA      |
|                        |                        | Anakinra              | -0.04 (-0.35, 0.26)           | -0.04 (-0.35, 0.26)         | NA                 | NA      |
|                        |                        | Etanercept            | <b>-0.47 (-0.89, -0.05)</b>   | <b>-0.47 (-0.89, -0.05)</b> | NA                 | NA      |
|                        |                        | Infliximab            | <b>-2.04 (-2.56, -1.52)</b>   | <b>-2.04 (-2.56, -1.52)</b> | NA                 | NA      |
|                        |                        | Tocilizumab           | <b>-0.6 (-1.05, -0.15)</b>    | <b>-0.6 (-1.05, -0.15)</b>  | NA                 | NA      |
|                        | Compared with HA       | Adalimumab            | <b>-0.62 (-1.16, -0.09)</b>   | <b>-0.62 (-1.16, -0.09)</b> | NA                 | NA      |
|                        |                        | Etanercept            | -0.21 (-0.84, 0.42)           | -0.21 (-0.84, 0.42)         | NA                 | NA      |
|                        | Compared with naproxen | Canakinumab           | <b>0.66 (0.24, 1.08)</b>      | <b>0.66 (0.24, 1.08)</b>    | NA                 | NA      |
| Function               | Compared with placebo  | Adalimumab            | -0.06 (-0.33, 0.20)           | -0.06 (-0.33, 0.20)         | 0%                 | 0.99    |
|                        |                        | Lutikizumab           | -0.06 (-0.27, 0.14)           | -0.06 (-0.27, 0.14)         | 0%                 | 0.33    |
|                        |                        | Canakinumab           | <b>1.55 (1.07, 2.03)</b>      | <b>1.55 (1.07, 2.03)</b>    | NA                 | NA      |
|                        |                        | Tocilizumab           | <b>-1.48 (-2.00, -0.97)</b>   | <b>-1.48 (-2.00, -0.97)</b> | NA                 | NA      |
|                        | Compared with HA       | Adalimumab            | <b>-0.88 (-1.44, -0.33)</b>   | <b>-0.88 (-1.44, -0.33)</b> | NA                 | NA      |
|                        |                        | Etanercept            | -0.09 (-0.72, 0.53)           | -0.09 (-0.72, 0.53)         | NA                 | NA      |
|                        | Compared with naproxen | Canakinumab           | <b>0.52 (0.10, 0.94)</b>      | <b>0.52 (0.10, 0.94)</b>    | NA                 | NA      |
|                        | Stiffness              | Compared with placebo | Adalimumab                    | 0.10 (-0.23, 0.43)          | 0.10 (-0.23, 0.43) | 0%      |
| Lutikizumab            |                        |                       | -0.20 (-0.57, 0.18)           | -0.20 (-0.57, 0.18)         | NA                 | NA      |
| Canakinumab            |                        |                       | <b>1.61 (1.12, 2.09)</b>      | <b>1.61 (1.12, 2.09)</b>    | NA                 | NA      |
| Compared with HA       |                        | Adalimumab            | -0.14 (-0.66, 0.39)           | -0.14 (-0.66, 0.39)         | NA                 | NA      |
|                        |                        | Etanercept            | -0.09 (-0.72, 0.54)           | -0.09 (-0.72, 0.54)         | NA                 | NA      |
| Compared with naproxen |                        | Canakinumab           | <b>0.83 (0.40, 1.25)</b>      | <b>0.83 (0.40, 1.25)</b>    | NA                 | NA      |

HA, hyaluronic acid; NA, not applicable

**Table S10. Sensitivity analysis in adverse events.**

| Intervention                |             | Odds Ratio (95% CI) |                    | I <sup>2</sup> | P value |
|-----------------------------|-------------|---------------------|--------------------|----------------|---------|
|                             |             | Fixed model         | Random model       |                |         |
| Compared with placebo       | Adalimumab  | 1.04 (0.59, 1.85)   | 1.07 (0.51, 2.26)  | 39%            | 0.20    |
|                             | Etanercept  | 1.44 (0.62, 3.34)   | 1.44 (0.62, 3.34)  | NA             | NA      |
|                             | Lutikizumab | 0.92 (0.49, 1.72)   | 0.93 (0.49, 1.74)  | 0%             | 0.75    |
|                             | Anakinra    | 0.75 (0.41, 1.40)   | 0.75 (0.41, 1.40)  | NA             | NA      |
|                             | Canakinumab | 0.48 (0.23, 1.01)   | 0.48 (0.23, 1.01)  | NA             | NA      |
|                             | Infliximab  | 3.00 (0.21, 42.62)  | 3.00 (0.21, 42.62) | NA             | NA      |
|                             | AMG108      | 1.13 (0.53, 2.43)   | 1.13 (0.53, 2.43)  | NA             | NA      |
|                             | Tocilizumab | 1.93 (0.79, 4.72)   | 1.93 (0.79, 4.72)  | NA             | NA      |
| Compared with HA            | Etanercept  | NA                  | NA                 | NA             | NA      |
|                             | Adalimumab  | 3.11 (0.12, 79.64)  | 3.11 (0.12, 79.64) | NA             | NA      |
| Compared with naproxen      | Canakinumab | 0.64 (0.31, 1.32)   | 0.64 (0.31, 1.32)  | NA             | NA      |
| Compared with standard care | Infliximab  | 1.00 (0.09, 11.03)  | 1.00 (0.09, 11.03) | NA             | NA      |

HA, hyaluronic acid; NA, not applicable

**Table S11. Node-splitting analyses of pain.**

| Name                | Direct Effect         | Indirect Effect       | Overall              | P-Value |
|---------------------|-----------------------|-----------------------|----------------------|---------|
| HA, adalimumab      | -1.69 (-12.25, 9.85)  | 4.54 (-14.43, 25.30)  | -1.29 (-7.19, 6.82)  | 0.44    |
| HA, etanercept      | -3.30 (-15.23, 10.66) | -9.88 (-28.73, 10.51) | -4.34 (-12.06, 3.83) | 0.46    |
| Adalimumab, placebo | 3.29 (-5.19, 10.98)   | 9.59 (-11.05, 32.53)  | 4.05 (-1.85, 9.67)   | 0.47    |
| Etanercept, placebo | 9.91 (-2.99, 22.59)   | 3.34 (-14.51, 20.24)  | 7.49 (-0.57, 15.93)  | 0.44    |

HA, hyaluronic acid

**Table S12. ISD of inconsistency test.**

| Outcome           | Inconsistency standard deviation [median(95% CI)] |
|-------------------|---------------------------------------------------|
| Pain              | 8.82 (0.25, 24.50)                                |
| Physical function | 8.21 (0.39, 15.91)                                |
| Stiffness         | 1.20 (0.06, 2.34)                                 |
| AEs               | <b>0.43 (0.03, 0.82)</b>                          |

ISD, Inconsistency Standard Deviation; AEs, adverse events

**Table S13. Results of Egger's test.**

| Outcome   | Std Eff | Coef.  | Std. Err | t     | P >  t | 95% Conf. Interval |
|-----------|---------|--------|----------|-------|--------|--------------------|
| Pain      | Slope   | -0.06  | 0.85     | -0.07 | 0.943  | [-1.93, 1.80]      |
|           | bias    | 0.11   | 4.11     | 0.03  | 0.980  | [-8.94, 9.16]      |
| Function  | Slope   | -0.56  | 0.75     | -0.75 | 0.474  | [-2.29, 1.16]      |
|           | bias    | 3.68   | 3.58     | 1.03  | 0.335  | [-4.59, 11.95]     |
| Stiffness | Slope   | -0.367 | 2.01     | -0.18 | 0.861  | [-5.27, 4.54]      |
|           | bias    | 2.43   | 8.60     | 0.28  | 0.787  | [-18.62, 23.49]    |
| AEs       | Slope   | -0.38  | 0.33     | -1.13 | 0.277  | [-1.09, 0.34]      |
|           | bias    | 0.85   | 0.69     | 1.22  | 0.242  | [-0.64, 2.34]      |

AEs, adverse events

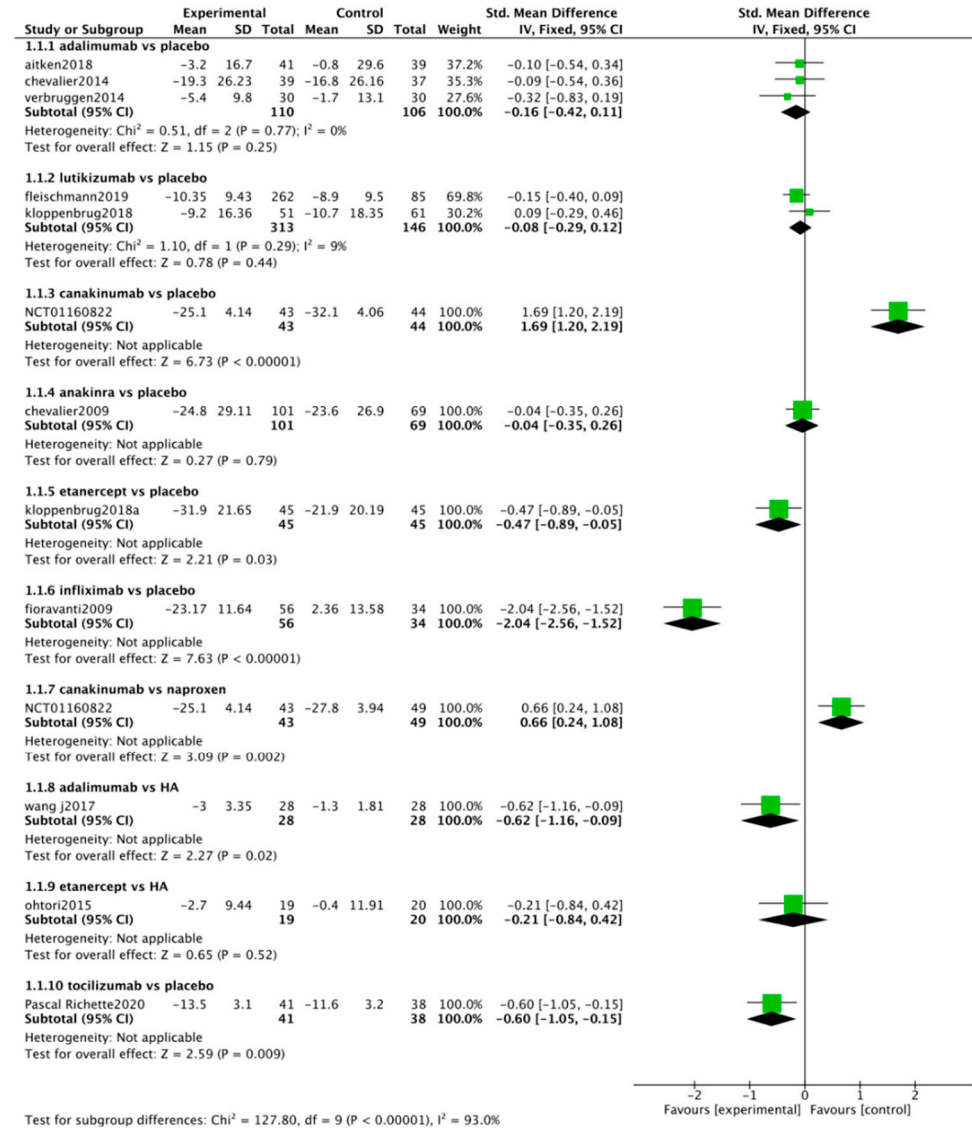

**Figure S1. Results of the conventional meta-analysis of pain. HA: hyalutonic acid.**

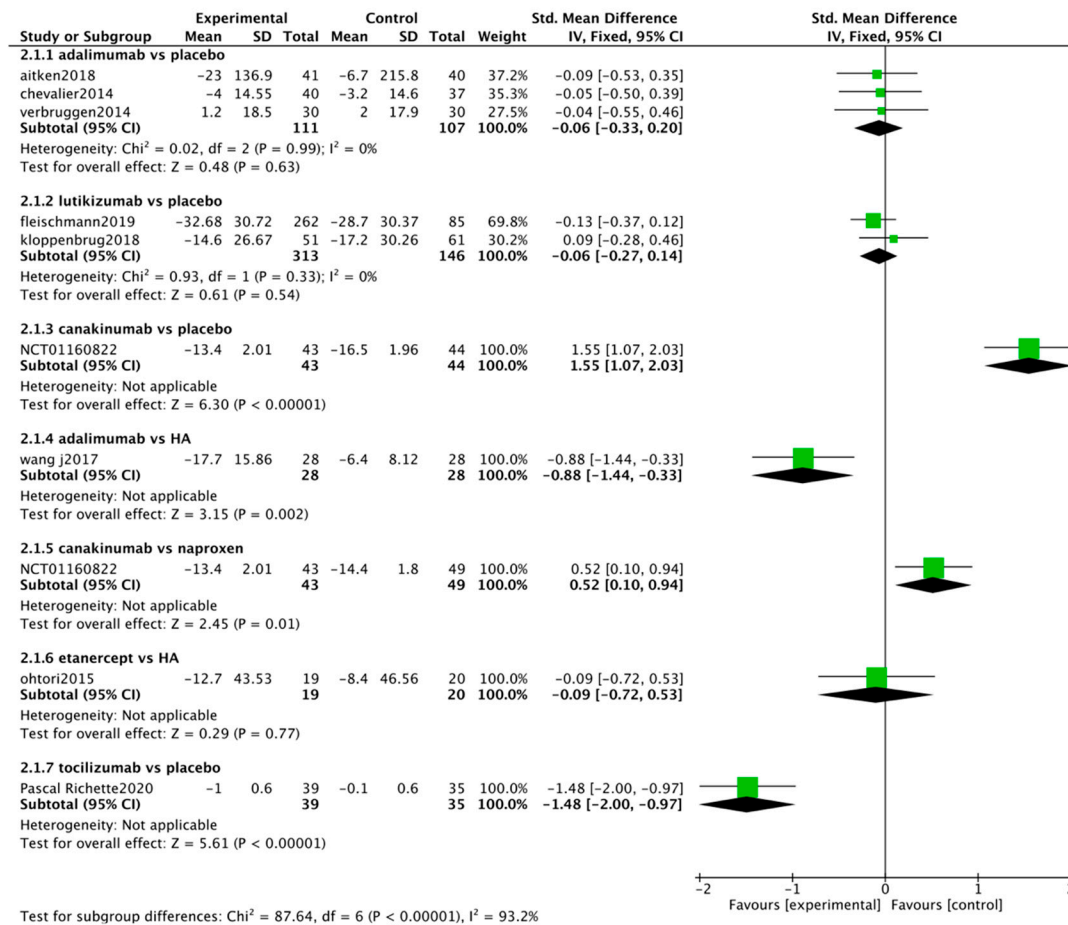

**Figure S2. Results of the conventional meta-analysis of physical function. HA: hyalutonic acid.**

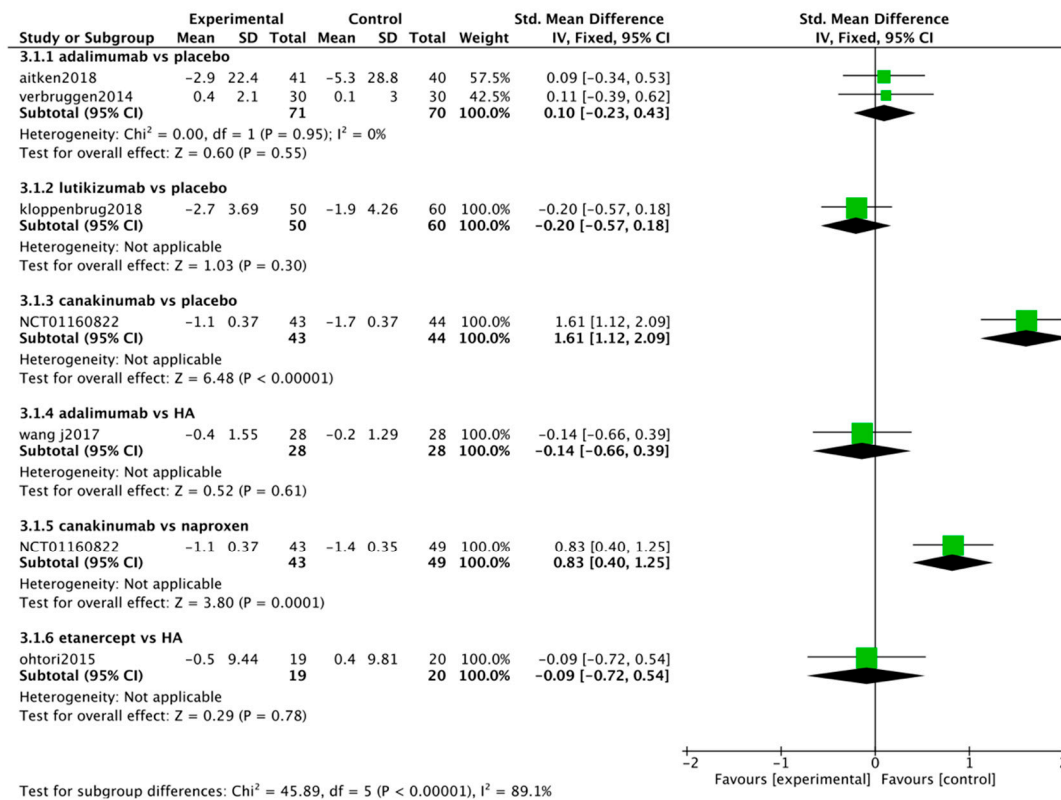

**Figure S3. Results of the conventional meta-analysis of stiffness. HA: hyalutonic acid.**

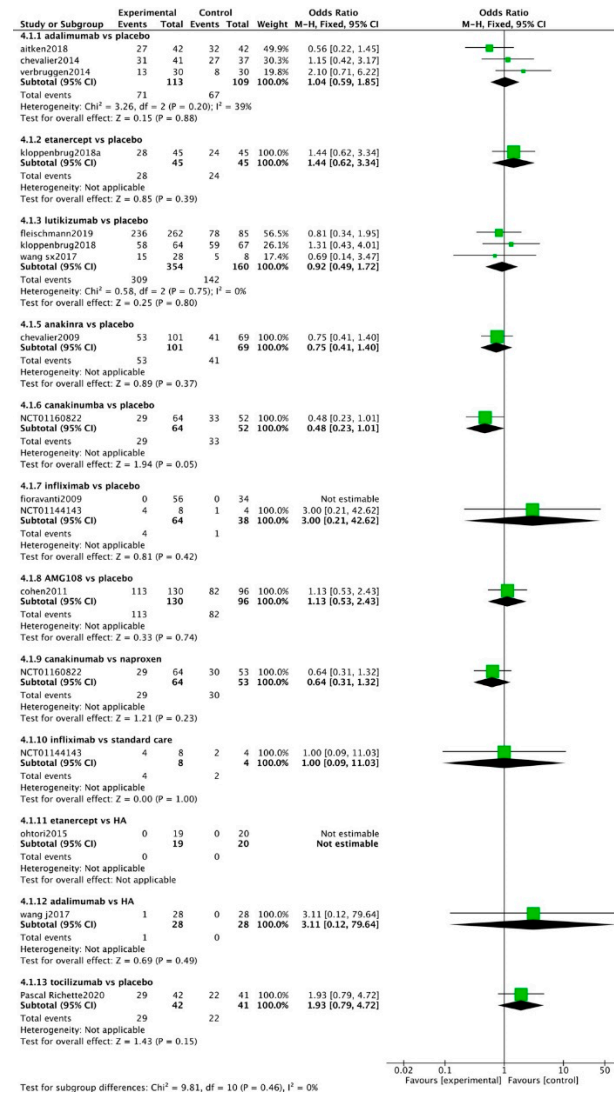

**Figure S4. Results of the conventional meta-analysis of adverse events. HA: hyalutonic acid.**



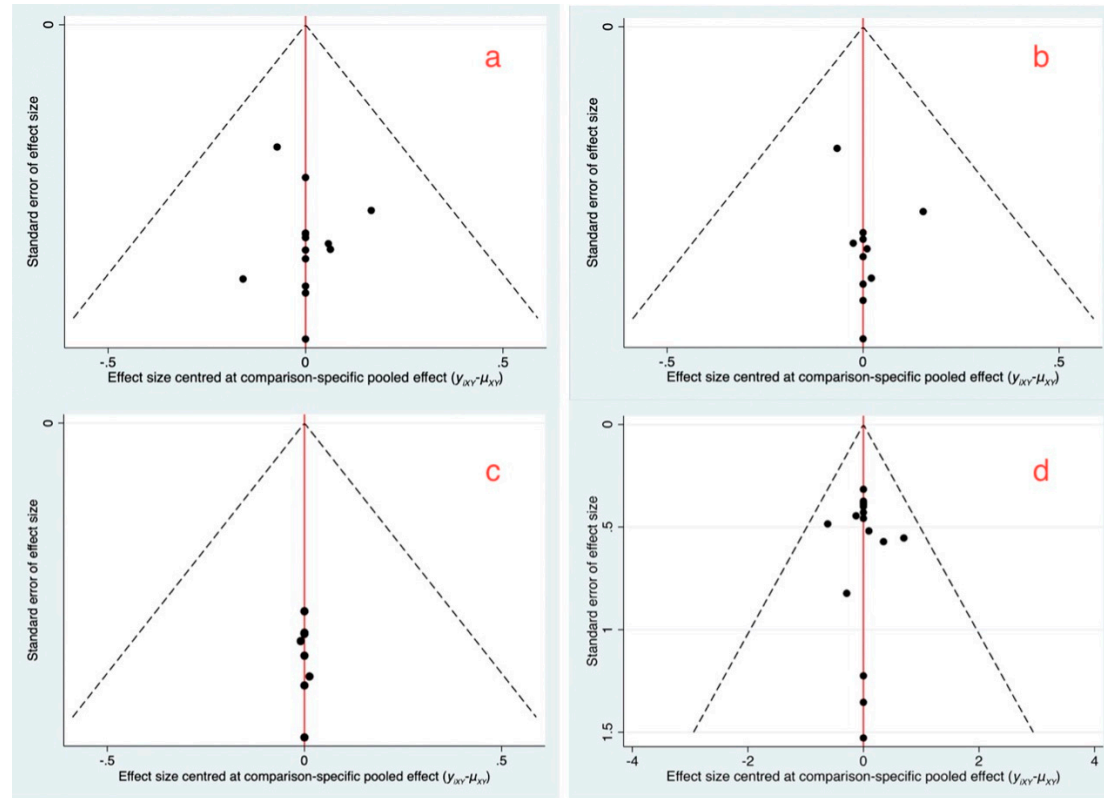

**Figure S5. Publication bias examined by funnel plot. a: pain; b: physical function; c: stiffness; d: adverse events.**
